# Structural dynamics of the two-component response regulator RstA in recognition of promoter DNA element

Yi-Chuan Li<sup>1,2,†</sup>, Chung-ke Chang<sup>3,†</sup>, Chi-Fon Chang<sup>4,†</sup>, Ya-Hsin Cheng<sup>3</sup>, Pei-Ju Fang<sup>3</sup>, Tsunai Yu<sup>3</sup>, Sheng-Chia Chen<sup>3</sup>, Yi-Ching Li<sup>1</sup>, Chwan-Deng Hsiao<sup>1,\*</sup> and Tai-huang Huang<sup>3,4,5,\*</sup>

<sup>1</sup>Institute of Molecular Biology, Academia Sinica, Taipei 115, Taiwan, ROC, <sup>2</sup>Institute of Bioinformatics and Structural Biology, National Tsing Hua University, Hsinchu 300, Taiwan, <sup>3</sup>Institute of Biomedical Sciences, Academia Sinica, Taipei 115, Taiwan, ROC, <sup>4</sup>Genomics Research Center, Academia Sinica, Taipei 115, Taiwan, ROC and <sup>5</sup>Department of Physics, National Taiwan Normal University, Taipei 116, Taiwan, ROC

Received May 6, 2014; Revised June 12, 2014; Accepted June 13, 2014

## ABSTRACT

The RstA/RstB system is a bacterial two-component regulatory system consisting of the membrane sensor, RstB and its cognate response regulator (RR) RstA. The RstA of *Klebsiella pneumoniae* (kpRstA) consists of an N-terminal receiver domain (RD, residues 1–119) and a C-terminal DNA-binding domain (DBD, residues 130–236). Phosphorylation of kpRstA induces dimerization, which allows two kpRstA DBDs to bind to a tandem repeat, called the RstA box, and regulate the expression of downstream genes. Here we report the solution and crystal structures of the free kpRstA RD, DBD and DBD/RstA box DNA complex. The structure of the kpRstA DBD/RstA box complex suggests that the two protomers interact with the RstA box in an asymmetric fashion. Equilibrium binding studies further reveal that the two protomers within the kpRstA dimer bind to the RstA box in a sequential manner. Taken together, our results suggest a binding model where dimerization of the kpRstA RDs provides the platform to allow the first kpRstA DBD protomer to anchor protein–DNA interaction, whereas the second protomer plays a key role in ensuring correct recognition of the RstA box.

## INTRODUCTION

Bacteria and plants frequently use two-component signal transduction systems (TCSs) to adapt to environmental changes and to survive under stress conditions (1–4). TCSs

are especially abundant in bacteria and absent in meta-zoans, making them attractive targets for antibacterial drug discovery (5). Typical TCSs couple a transmembrane histidine protein kinase (HK), which detects changes in the environment, to a cytosolic response regulator (RR), which often alters gene expression. External stimulus leads to autophosphorylation of the HK, which is then able to form a complex with the cognate RR and allow the transfer of the phosphate group to a conserved Asp residue of the RR. Phosphorylation alters intra-molecular interactions within the RR, which allows it to bind to DNA, resulting in up- or down-regulation of downstream genes (6).

The RstB/RstA system is a ubiquitous TCS composed of the membrane-associated histidine kinase RstB and its cognate response regulator RstA. In *Escherichia coli* and *Salmonella*, RstA is under the control of the PhoP/PhoQ TCS, which monitors extracellular Mg<sup>2+</sup> levels, and up-regulates the acid-induced *asr* (acid shock RNA) gene and the biofilm regulator *csqD* gene under acidic conditions (2,7,8). Overexpression of RstA in *Salmonella enterica* serovar Typhimurium induced degradation of RpoS and altered biofilm formation (9). Moreover, RstA directly binds to the promoter of the *feo* operon in *Salmonella* and promotes the expression of the iron transporter FeoB under iron-replete conditions (10). Since both biofilm formation and iron acquisition are often associated with the ability of the organism to establish infection (11,12), RstA may play a regulatory role in virulence. Preliminary experiments on *Yersinia pseudotuberculosis* have also shown that mutations on the *rstA* gene attenuated virulence in mouse models (13).

*Klebsiella pneumoniae* is an important pathogen associated with nosocomial infections (14). Emergence of *K. pneumoniae* variants with multiple antimicrobial resistances has

\* To whom correspondence should be addressed. Tel: +886 2 2652 3036; Fax: +886 2 2788 7641; Email: bmthh@ibms.sinica.edu.tw.

Correspondence may also be addressed to Chwan-Deng Hsiao. Tel: +886 2 2788 2743; Fax: +886 2 2782 6085; E-mail: hsiao@gate.sinica.edu.tw

†The authors wish it to be known that, in their opinion, the first three authors should be regarded as Joint First Authors.

become a serious problem in hospitals worldwide. Association of RstB/RstA with multiple virulence factors highlights its potential as a drug target, and emphasizes the importance of investigating its mechanism of action. *K. pneumoniae* RstA (*kpRstA*) contains an N-terminal receiver domain (RD, residues 1–119) and a C-terminal DNA-binding domain (DBD, residues 131–236), with an overall sequence identity of 79% compared to RstA from *E. coli* and *S. enterica* serovar Typhimurium (see Supplemental Figure S1). As a member of the OmpR/PhoB subfamily, phosphorylation of the conserved Asp in the RD is believed to result in dimerization of the domain through a conserved  $\alpha 4$ – $\beta 5$ – $\alpha 5$  region, accompanied by the binding of the DBD to cognate sequences in the promoter region of RstA-regulated genes. Genomic systematic evolution of ligands by exponential enrichment (SELEX) experiments in *E. coli* have shown that RstA binds to the consensus sequence TACATNTNGT-TACA with tandem TACA recognition sites (8). Like other members of the OmpR/PhoB subfamily, it is implied that dimerization of RstA is necessary for binding to this tandem sequence, with each DBD binding to a single recognition site (15,16). The consensus sequence, called the RstA box, can also accommodate imperfections in the TACA sequence. *Klebsiella* RstA is capable of activating the RstA box of the *asr* gene in *K. pneumoniae*, which contains a RstA box with a TACA/TACT imperfect repeat instead of the canonical TACA repeat found in the *E. coli asr* gene (17).

Although proteins of the OmpR/PhoB subfamily share a high degree of structural similarity, there is little consensus on how they recognize the tandem DNA sequences in the context of a dimer. For example, the two DBDs of the OmpR dimer can bind to different DNA sequences in either head-to-tail or head-to-head orientations (18–20), whereas the DBDs of PhoB and PmrA bind to DNA exclusively in a head-to-tail orientation (21,22). Moreover, binding of PhoB to DNA induces bending in the DNA, which is not observed for PmrA. These observations imply divergent structural bases for tandem sequence recognition within the same protein subfamily. Here we report the characterization of *kpRstA* binding to the RstA box sequence located in the *asr* promoter of *K. pneumoniae* by isothermal titration calorimetry (ITC). The structures of *kpRstA* RD activated with  $\text{BeF}_3^-$ , free *kpRstA* DBD and *kpRstA* DBD in complex with DNA are also disclosed through a combination of X-ray crystallography and nuclear magnetic resonance (NMR) spectroscopy. Furthermore, we compare the backbone dynamics of the DBD in the bound and free forms. Surprisingly, the *kpRstA* dimer binds to the RstA box DNA sequence in a sequential fashion which has never been observed in other RRs. The combination of multifaceted approaches allows us to formulate a sequence of events behind the activation and unique DNA recognition mechanism of *kpRstA*.

## MATERIALS AND METHODS

### Chemicals and reagents

$\text{BeSO}_4$  was purchased from Mitsuwa Pure Chemicals (Japan). Other chemical reagents were purchased from Sigma (USA) and Merck (USA). DNA sequences were synthesized by Genomics Ltd (Taiwan). Double-stranded

DNA was obtained by mixing together complementary strands in the buffer for the current experiment, followed by denaturation at 95°C for 5 min and slowly cooling down to room temperature.

### Cloning, protein expression and purification

Full-length *kpRstA* was cloned into a modified pET32a(+) vector which lacked the region coding for the enterokinase cleavage site. *kpRstA* RD and *kpRstA* DBD were cloned into pET6H vector (a gift from Prof. J.-J. Lin, National Yang Ming University, Taiwan). The proteins were expressed in *E. coli* BL21(DE3) strain by growing the cells in 1.0 liter LB medium at 37°C until reaching an  $\text{OD}_{600}$  of 0.6–0.8 followed by induction with 1.0 mM isopropyl  $\beta$ -D-1-thiogalactopyranoside (IPTG). The cells were then allowed to grow overnight at 18°C before harvest. Isotope-labeled proteins for NMR experiments were produced by centrifuging and re-suspending the cells in 250 ml 2xM9 medium supplemented with 1.0 g/l of  $^{15}\text{NH}_4\text{Cl}$  and/or 1.0 g/l  $u\text{-}^{13}\text{C}$ -glucose prior to induction. Deuterated samples were obtained by substitution of water and  $u\text{-}^{13}\text{C}$ -glucose with  $^2\text{H}_2\text{O}$  and  $u\text{-}^{13}\text{C}, ^2\text{H}$ -glucose in this step. To solve the crystallographic phase problem, selenomethionine (SeMet)-labeled samples of *kpRstA* RD and *kpRstA* DBD were obtained by growing *E. coli* B834(DE3) strain in LeMaster medium supplemented with 50  $\mu\text{g}/\text{ml}$  SeMet, 1% glucose, 1 mM  $\text{MgSO}_4$ , 0.25 mg/ml  $\text{MgSO}_4$  and 7.68  $\mu\text{g}/\text{ml}$   $\text{FeSO}_4$  during the induction phase. To achieve sufficient labeling, we constructed the *kpRstA* DBD(L153M/L168M) mutant where both Leu153 and Leu168 were changed to Met. Another loss-of-function mutant, R207A, was constructed for ITC experiments. The mutations were introduced into pET6H-*kpRstA*-DBD through site-directed mutagenesis by polymerase chain reaction (PCR) with the primers listed in Supplemental Table S1. All expressed proteins contained an N-terminal His-tag that was later removed in the case of full-length *kpRstA*.

The cells were lysed with a microfluidizer in loading buffer (20 mM Tris, 100 mM NaCl, pH 7.5) and the lysate spun down at 30 000 g on an Avanti J-26XP centrifuge (Beckman-Coulter, USA). The supernatant was loaded onto Ni-NTA resin (Qiagen, USA) pre-equilibrated with the loading buffer and eluted with the same buffer containing 300 mM imidazole. The eluted proteins were further purified by size-exclusion chromatography using an Akta fast-performance chromatography system (FPLC) equipped with a HiLoad Superdex-75 16/60 column (GE Healthcare, USA) equilibrated with the elution buffer solution (20 mM sodium phosphate, 50 mM NaCl, pH 6.0). The His-tag of full-length *kpRstA* was removed by digestion with 75 U of thrombin (GE Healthcare, USA) for 2 days at 4°C and the cleaved protein was further purified following manufacturer's instructions. The resulting full-length *kpRstA* contained a GSAMA sequence at the N-terminus, whereas both *kpRstA*-RD and *kpRstA*-DBD contained an extraneous N-terminal M-6H-AMG sequence.

### Isothermal titration calorimetry

ITC was performed with a Microcal ITC<sub>200</sub> calorimeter (GE Healthcare, USA) at 25°C. Protein and DNA solution

were dialyzed overnight against the same reaction buffer (20mM Tris, pH7.5, 100 mM NaCl in the case of *kpRstA* DBD and 20mM Tris, pH7.5, 100 mM NaCl, 7 mM MgCl<sub>2</sub> with or without 5.3 mM BeSO<sub>4</sub> and 35 mM NaF for full-length *kpRstA*). For *kpRstA* DBD, the titration was conducted by injecting 1 μl (first injection) or 2 μl (second to 19th injections) of 2 mM protein solution into 200 μl of 80 μM DNA (16- or 22-bp) solution. For full-length *kpRstA*, the titration was conducted by injecting 1.2 μl (first to 17th injections) or 1.6 μl (18th to 29th injections) of 1.0 mM protein solution into 200 μl of 57 μM 22-bp DNA solution. An initial delay of 180 s was applied before the first injection, with a 120 s interval between two successive injections. The binding isotherms of *kpRstA* DBD against 16-bp DNA were fitted to a single-site binding model while those of *kpRstA* DBD and full-length *kpRstA* against the 22-bp DNA were fitted to a sequential binding model under the Microcal Origin package (GE Healthcare, USA).

### NMR experiments

The NMR spectra were acquired on Bruker AVANCE 500, 600 or 800 MHz spectrometers (Bruker, Germany) equipped with 5-mm triple resonance cryoprobes at 25 or 37°C. NMR data were acquired in Shigemi tubes on 0.1–1.0 mM protein samples in NMR buffer (20 mM sodium phosphate, 50 mM NaCl, 1 mM EDTA, 1 mM DTT, 10% (v/v) D<sub>2</sub>O) at pH 6 for free *kpRstA* DBD and at pH 6.5 for the *kpRstA* DBD/DNA complex. The <sup>15</sup>N, <sup>13</sup>C- and <sup>15</sup>N, <sup>13</sup>C, <sup>2</sup>H-labeled protein/DNA complex samples were prepared at a protein-to-DNA molar ratio of 1:1.2. As the 16-bp DNA substrate gave the best NMR spectra, they were used for all NMR studies. Protein backbone resonance assignments of *kpRstA* DBD and its complex with DNA were achieved by standard triple resonance experiments, including HNCA, HN(CO)CA, HNCACB, CBCA(CO)NH, HNCO and HN(CA)CO (23–27). Ambiguities in the backbone assignment were resolved by specific amino labeling of the protein. Complete assignment of free *kpRstA* DBD has been described elsewhere (28). <sup>1</sup>H chemical shifts were externally referenced to 0 ppm through the methyl resonance of 2,2-dimethyl-2-silapentane-5-sulfonate (DSS), whereas <sup>13</sup>C and <sup>15</sup>N chemical shifts were indirectly referenced according to the recommendations of the International Union of Pure and Applied Chemistry (29). The weighted chemical shift perturbations (CSPs) of *kpRstA* DBD backbone <sup>15</sup>N and <sup>1</sup>H resonances upon DNA binding were calculated with the following equation:  $\Delta\delta = [(\Delta\delta_{\text{HN}})^2 + (0.154\Delta\delta_{\text{N}})^2]^{1/2}$ .

Both <sup>13</sup>C- and <sup>15</sup>N-edited NOESY-HSQC experiments were conducted with a mixing time of 120 ms to obtain distance restraints for the structure calculation of free *kpRstA* DBD. The NMR spectra were processed using Bruker TOPSPIN 3.0 and analyzed with Sparky (Goddard, T.D. and Kneller, D.G., University of California San Francisco) and CARA (available from: <http://www.nmr.ch>). To measure one-bond <sup>1</sup>H-<sup>15</sup>N residual dipolar couplings (RDC), free *kpRstA* DBD was partially aligned in liquid crystalline phase containing 15 mg/ml Pfl bacteriophage (Asla Biotech Ltd, Latvia). Changes in splitting relative to the isotropic <sup>1</sup>J<sub>NH</sub> values were measured using DSSE-HSQC experiments to obtain one bond <sup>1</sup>H-<sup>15</sup>N RDCs (30). The

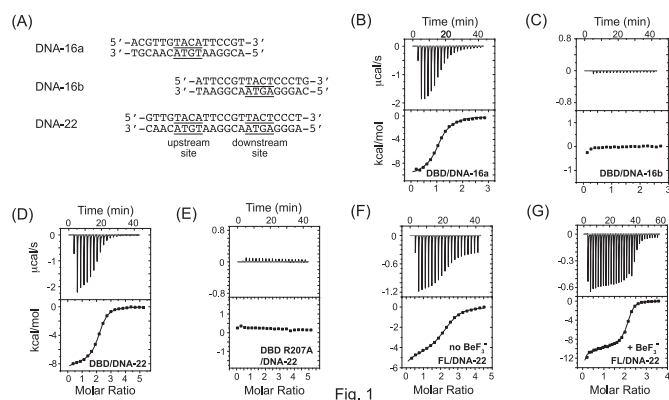

**Figure 1.** Determination of binding isotherm of *kpRstA* DBD with various RstA box DNA by isothermal titration calorimetry. The sequences of the duplex DNA used in this study are listed in (A). Binding of *kpRstA* DBD to DNA-16a (B) and DNA-16b (C) or DNA-22 (D) are shown with the ITC traces in the upper panel and the binding isotherms in the lower panel. The binding isotherm of the *kpRstA* DBD R207A mutant to DNA-16a is shown in (E). Binding of full-length *kpRstA* to DNA-22 is shown in (F) and that of *kpRstA* in the presence of BeF<sub>3</sub><sup>-</sup> is shown in (G). Detailed fitting parameters are listed in Table 1.

measured RDCs were analyzed using the program PALES (31).

The <sup>15</sup>N spin-lattice/longitudinal relaxation rate, <sup>15</sup>N-R<sub>1</sub>, spin-spin/transverse relaxation rate, <sup>15</sup>N-R<sub>2</sub>, and [<sup>1</sup>H-<sup>15</sup>N]NOE were determined by using standard pulse sequences (32). Each <sup>15</sup>N-R<sub>1</sub> was determined with ten randomly ordered delays of 0.8, 118.8, 238.8, 358.8, 478.8, 598.8, 718.8, 898.8, 1018.8 and 1288.8 ms. Similarly, each <sup>15</sup>N-R<sub>2</sub> was determined from 10 delays, in random order, of 0, 34.3, 51.5, 68.6, 102.9, 120.1, 154.4, 188.7, 205.8 and 223.0 ms for free *kpRstA* DBD; 0, 17.2, 34.3, 51.5, 68.6, 85.8 and 102.9 ms for the *kpRstA* DBD/DNA complex. Both rate constants were determined using the program Protein Dynamics Center (Bruker, Germany), assuming mono-exponential decay of the peak intensities. The errors in peak intensities were calculated from two duplicate experiments. The steady-state heteronuclear [<sup>1</sup>H-<sup>15</sup>N] NOE experiment was carried out in duplicate in an interleaved manner, with and without proton saturation. The NOE was calculated as the error-weighted average ratio of peak intensities, with error estimated by standard deviation of three pairs of repeated experiments. The reduced spectral density analysis was performed as previously described (33–37).

### NMR structure determination

The solution structure of *kpRstA* DBD was calculated with CYANA 3.0 based on experimental restraints (38,39). Distance restraints were generated by picking and quantifying NOE peaks using the automatic peak picking routine of AURELIA (Bruker, Germany) followed by automated NOE cross-peak assignment with CYANA 3.0. The restraints were grouped into short- (<=1 Å), middle- (1–5 Å) and long-range (>=5 Å) distances. Backbone torsion angle restraints were predicted from backbone chemical shifts with TALOS+ (40), and only those identified as ‘good’ by the program were used in the structure calculation. Hydro-

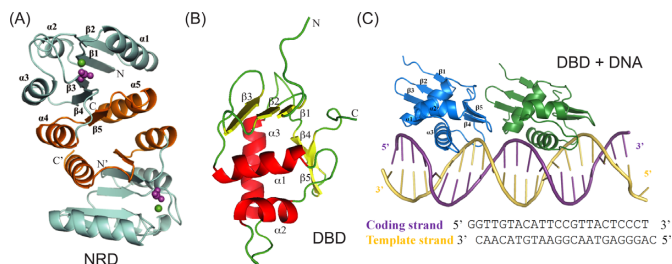

**Figure 2.** Structural overview of *kpRstA* domains. (A) Crystal structure of the *kpRstA* RD dimer in the presence of  $\text{BeF}_3^-$ . Dimer formation is mediated by the  $\alpha 4$ - $\beta 5$ - $\alpha 5$  interfaces highlighted in gold. The ligands within the phosphorylation site are shown as spheres with  $\text{Mg}^{2+}$  in green and  $\text{BeF}_3^-$  in magenta. (B) Solution structure of *kpRstA* DBD with the helices and  $\beta$ -strands highlighted in red and yellow, respectively. (C) Crystal structure of *kpRstA* DBD in complex with DNA-23, which contains the same sequence as DNA-22 with overhanging G bases to facilitate crystallization. Each DNA-23 binds to two DBD molecules, with the upstream and downstream promoters colored in blue and green, respectively.

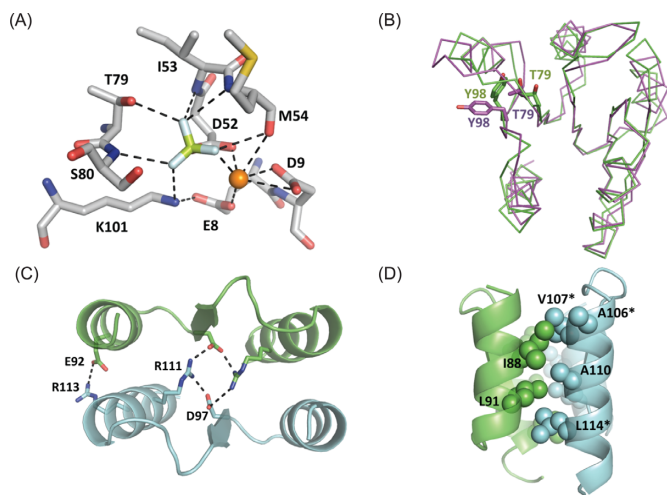

**Figure 3.** (A) Interactions between beryllium fluoride and *kpRstA* RD phosphorylation site. (B) Structural alignment of *kpRstA* RD in the presence of  $\text{BeF}_3^-$  (green) and inactivated PhoP RD (magenta) shows significant conformational changes of the switch residues Thr79 and Tyr98. (C) The intermolecular interface is stabilized by two salt bridges formed between Asp97 ( $\beta 5$ )-Arg111 ( $\alpha 5$ ) and Glu92 ( $\alpha 4$ )-Arg113 ( $\alpha 5$ ). Salt bridges are shown as dotted lines. (D) The  $\alpha 4$  and  $\alpha 5$  helices are packed together through a hydrophobic patch (spheres) formed by Ile88, Leu91, Ala106, Val107, Ala110 and Leu114. Stars (\*) denote non-conserved residues among the OmpR/PhoB subfamily.

gen bond restraints were generated for secondary structure regions by assigning the following distance constraints: 1.8–2.6 Å for  $\text{H}^{\text{N}}-\text{O}$  and 2.7–3.5 Å for  $\text{N}-\text{O}$ . A list of restraint statistics is provided in Supplemental Table S2. Measured RDCs (71 out of 119) were also used in the calculation. Out of 150 calculated conformers, the 20 conformers with the lowest target functions were deposited to the Protein Data Bank (PDB) with accession code: 2MLK. All structural figures were prepared with MOLMOL (41) and PyMOL (42).

### Crystallization and data collection

For crystallization trials, *kpRstA* DBD was mixed with 23-bp DNA substrate (Figure 2C) at a molar ratio of 2:1

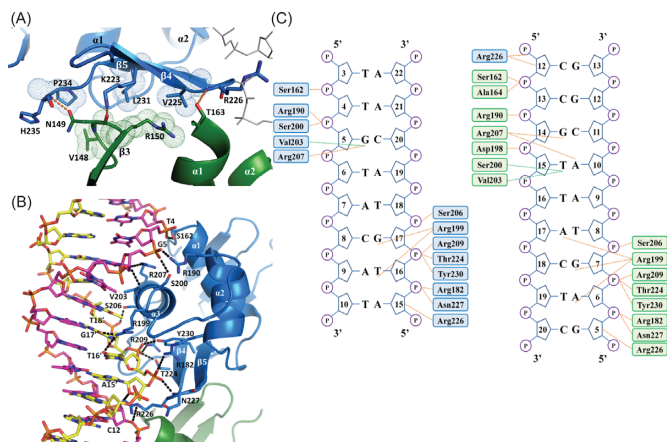

**Figure 4.** Intermolecular interactions in the *kpRstA* DBD/DNA-23 complex. (A) Protein-protein interactions between the upstream (blue) and downstream (green) DBDs. Hydrogen bonds and hydrophobic interactions are shown in orange dashes and space-fill dots, respectively. (B) Interactions between the upstream DBD promoter and DNA-23. The coding and template strands are colored magenta and yellow, respectively. (C) Schematic of the interactions between the DBDs and DNA-23. The upstream and downstream DBDs are represented by blue and green colors, respectively. Orange dots represent hydrogen bonds and salt bridges, and green dots represent van der Waals interactions. Residues involved in nonspecific interactions are located at helices  $\alpha 1$  (Ser162),  $\alpha 2$  (Arg182, Arg190),  $\alpha 3$  (Ser206, Ser206, Arg209), the C-terminal  $\beta$ -hairpin (Thr224, Asn226, Asn227) and  $\beta 5$  (Tyr230).

(DNA:protein) and concentrated to 20 mg/ml in preparation buffer (20 mM Tris-HCl, pH 7.5 and 100 mM NaCl). *kpRstA* RD was similarly prepared except that the preparation buffer contained additional 5.3 mM  $\text{BeSO}_4$ , 35 mM NaF and 7 mM  $\text{MgCl}_2$ . Initial crystallization trials were performed with commercially available kits (Hampton Research, USA) using the hanging drop vapor diffusion method (43). Specifically, 1  $\mu\text{l}$  of concentrated complex was mixed with an equal amount of reservoir solution and equilibrated against 500  $\mu\text{l}$  of reservoir solution at 26°C. After optimization of crystallization conditions, rhombus-shaped *kpRstA* RD crystals appeared in 100 mM Bis-Tris, pH 6.5 and 25% (v/v) polyethylene glycol 3350, whereas *kpRstA* DBD/DNA formed plate-shaped crystals in 100 mM Bis-Tris, pH 5.5, 28% (v/v) polyethylene glycol 400 and 1.32 M sodium formate. The phase of *kpRstA* RD crystals were determined by single-wavelength anomalous diffraction (SAD) of SeMet-labeled crystals at 0.97874 Å (Se-peak). The phase of *kpRstA* DBD/DNA crystals were determined by collecting multi-wavelength anomalous diffraction (MAD) data on a single SeMet-labeled crystal of *kpRstA* DBD(L153M/L168M)-DNA complex at three different wavelengths: 0.97879 Å (Se-edge), 0.96357 Å (Se-remote) and 0.97862 Å (Se-peak). All data were collected on an ADSC Quantum-315 CCD area detector at beamline BL13B1 of the National Synchrotron Radiation Research Center, Hsinchu, Taiwan. X-ray diffraction data integration and scaling were performed using the HKL2000 package (44). For the MAD experiment, data from each wavelength were indexed according to the same crystal orientation matrix, but integrated and scaled independently. Diffraction data statistics are listed in Supplemental Table S2.

## Crystal structure determination and refinement

Crystals of *kpRstA* RD and *kpRstA* DBD/DNA complex diffracted to 3.1 and 2.7 Å, respectively. Experimental phases of *kpRstA* DBD/DNA complex were obtained at 2.7 Å using the MAD method implemented in the program AutoSol from the PHENIX suite (45). The programs COOT (46) and PHENIX were then used for rounds of manual model rebuilding and refinement, respectively. The final model for *kpRstA* DBD/DNA complex contained two proteins (102 residues in chain A and 101 residues in chain B), one double-stranded DNA molecule (22 nucleotides in chain C and 23 nucleotides in chain D) and 63 water molecules in the asymmetric unit. The structure was refined to a final  $R_{\text{work}}$  and  $R_{\text{free}}$  of 21.6 and 27.1%, respectively, with good stereochemistry. The structure of *kpRstA* RD was solved by employing the MR-SAD protocol as implemented in PHENIX (47) using a poly-alanine monomer of the PhoB RD structure (PDB code: 1ZES) as the search model. Molecular replacement was performed with the AutoMR program within PHENIX using the data set collected at the absorption edge (0.97891 Å). The resulting model with one dimer in the asymmetric unit was used for initial refinement, model phase calculations, location of selenium positions, SAD phasing, phase combination, density modification and model building in an automatic manner. The final model contained four *kpRstA* RD molecules (corresponding to two dimers, with 117 residues in each chain), four  $\text{BeF}_3^-$ , four  $\text{Mg}^{2+}$  atoms and 38 water molecules in the asymmetric unit. The structure was refined to a final  $R_{\text{work}}$  and  $R_{\text{free}}$  of 18.7 and 22.3%, respectively. The Ramachandran plot outliers of *SeMet-RstA* RD are mostly located on the C-terminus (Arg117 of chain A and Leu116 of chain B) and in loop regions (Asp9, Asp10 on chain B and Ile53 on chain C). Detailed refinement parameters for both structures are available in Supplemental Table S2. Coordinates of *kpRstA* DBD/DNA and *kpRstA* RD have been deposited to the PDB with accession codes: 4NHJ and 4NIC, respectively.

## RESULTS

### Promoter binding affinity and thermodynamics of *kpRstA*-RstA box interaction

The binding affinities of *kpRstA* DBD to the upstream half-site of the RstA box (DNA-16a), downstream half-site of the RstA box (DNA-16b) and the full-length RstA box (DNA-22) were studied by isothermal titration calorimetry (Figure 1). As shown on Figure 1B and Table 1, the titration curve of *kpRstA* DBD to DNA-16a could be fitted well with a single binding site of  $K_D = 8.17 \pm 0.54 \mu\text{M}$  with  $\Delta H = -10.12 \pm 0.12 \text{ kcal/mol}$  and  $\Delta S = -10.7 \text{ cal/mol/deg}$ , indicating that the binding is enthalpically driven. In contrast, the binding of *kpRstA* DBD to DNA-16b did not generate enough heat to obtain reliable thermodynamic parameters, suggesting extremely weak protein–DNA interactions (Figure 1C). The titration curve of *kpRstA* DBD to the full length RstA box (DNA-22) was fitted with a sequential binding model of  $K_{D1} = 10.3 \pm 1.13 \mu\text{M}$ ,  $\Delta H_1 = -9.48 \pm 0.23 \text{ kcal/mol}$ ,  $\Delta S_1 = -8.98 \text{ cal/mol/deg}$  and  $K_{D2} = 5.15 \pm 0.26 \mu\text{M}$ ,  $\Delta H_2 = -6.89 \pm 0.25 \text{ kcal/mol}$ ,

$\Delta S_2 = 1.07 \text{ cal/mol/deg}$  (Figure 1D). Although the data can be fit equally well with two independent equivalent sites of  $K_D = 3.40 \pm 0.33 \mu\text{M}$ ,  $\Delta H = -7.95 \pm 0.08 \text{ kcal/mol}$ ,  $\Delta S = -1.63 \text{ cal/mol/deg}$ , the results would not agree with the half-site binding results which showed that the downstream half-site binds to DBD poorly. The results suggest that binding of *kpRstA* DBD to the first site enhances the binding of the second *kpRstA* DBD to the second site. Mutation of Arg207, one of the key residues responsible for DNA binding (see Figure 4C), to Ala completely abolished the DNA binding of *kpRstA* DBD (Figure 1E).

The titration curve of full-length *kpRstA* protein to DNA-22 was characterized by a biphasic behavior. The binding isotherms fit poorly to either a one-site model or multiple-site model and only the sequential binding model gave a satisfactory fit with  $K_{D1} = 45.45 \pm 8.41 \mu\text{M}$ ,  $\Delta H_1 = -9.79 \pm 1.07 \text{ kcal/mol}$ ,  $\Delta S_1 = -13.0 \text{ cal/mol/deg}$  and  $K_{D2} = 5.05 \pm 0.72 \mu\text{M}$ ,  $\Delta H_2 = -0.48 \pm 1.11 \text{ kcal/mol}$ ,  $\Delta S_2 = 22.6 \text{ cal/mol/deg}$  (Figure 1F). The lower affinity of the first site compared to that of *kpRstA* DBD is consistent with the inhibitory effect of the RD on DBD binding to DNA reported for other TCS response regulators. The RD of PrrA, e.g. sterically blocks the DNA-binding site of its DBD in the absence of  $\text{BeF}_3^-$ , which results in lower affinity of full-length PrrA towards DNA when compared to the DBD by itself (48). PhoB exemplifies another possibility, where the RD is capable of adopting an alternative dimer conformation in the absence of  $\text{BeF}_3^-$  that has been proposed to interfere with the correct alignment of the DBDs for binding (49,50). Interestingly, binding to the second site was entropy-driven, which suggests changes in conformation and/or formation of hydrophobic contacts. The binding affinity of the full-length *kpRstA* towards DNA-22 was significantly enhanced in the presence of  $\text{BeF}_3^-$  ( $K_{D1} = 9.14 \pm 1.84 \mu\text{M}$  and  $K_{D2} = 0.59 \pm 0.09 \mu\text{M}$ ), primarily through increases in binding enthalpy, although strong entropic contributions persisted for the second site (see Table 1). Size exclusion chromatography showed that the presence of  $\text{BeF}_3^-$  induced dimerization of full-length *kpRstA* (data not shown), which suggests that the enhanced binding is caused by the dimerization of the protein.

### Structural overview of *kpRstA* RD, DBD and DBD/DNA complex

The structure of *kpRstA* RD in the presence of  $\text{BeF}_3^-$  was solved to a resolution of 3.2 Å (Figure 2A). Similar to the structure reported for TorR RD (51), four *kpRstA* RD molecules, which correspond to two dimers, were found in the asymmetric unit (see Supplemental Figure S2). The two dimers within the asymmetric unit had similar structures as revealed by structural alignment, with an rmsd of 0.47 Å over 117 C $\alpha$ . Structural analyses revealed that the overall structure of *kpRstA* RD has the traditional  $(\beta\alpha)_5$  fold of RR regulatory domains that consists of a central five-stranded parallel  $\beta$ -sheet surrounded by five-helices.

The structural topology of *kpRstA* DBD in solution consists of the N-terminal three-strand antiparallel  $\beta$ -sheet ( $\beta_1$ , Thr137–Ser139;  $\beta_2$ , Leu143–Asp146;  $\beta_3$ , Arg149–Leu153) followed by three helices assuming the helix–turn–helix DNA binding motif topology ( $\alpha_1$ , Thr63–Thr174;  $\alpha_2$ ,

**Table 1.** Binding parameters of full-length (FL) *kpRstA* and *kpRstA* DBD towards RstA box DNA sequences

| Sample                                                | Model      | <i>N</i> | <i>K<sub>D</sub></i> (μM) | Δ <i>H</i> (cal/mol) | Δ <i>S</i> (cal/mol/deg) |
|-------------------------------------------------------|------------|----------|---------------------------|----------------------|--------------------------|
| DBD/DNA-16a                                           | One-site   | 1.05     | 8.17 ± 0.53               | −10100 ± 120         | −10.7                    |
| DBD/DNA-16b                                           | -          | -        | -                         | -                    | -                        |
| DBD/DNA-22                                            | Sequential | Set as 2 | 10.31 ± 1.14              | −9480 ± 233          | −8.98                    |
|                                                       |            |          | 5.15 ± 0.3                | −6893 ± 252          | 1.07                     |
| DBD-R207A/DNA-22                                      | -          | -        | -                         | -                    | -                        |
| FL/DNA-22<br>(without BeF <sub>3</sub> <sup>−</sup> ) | Sequential | Set as 2 | 45.45 ± 8.41              | −9792 ± 1070         | −13.0                    |
|                                                       |            |          | 5.05 ± 0.72               | −478.7 ± 1110        | 22.6                     |
| FL/DNA-22<br>(with BeF <sub>3</sub> <sup>−</sup> )    | Sequential | Set as 2 | 9.14 ± 1.84               | −17400 ± 1380        | −35.3                    |
|                                                       |            |          | 0.59 ± 0.09               | −3028 ± 1400         | 18.4                     |

Arg182–Arg190; α3, Asp198–Leu212) and ending with a β-hairpin (β4, Ile222–Val225; β5, Lys228–Phe232) (Figure 2B). The N-terminal β-sheet interacts with helix α1 primarily through hydrophobic interactions while stacking interaction between the aromatic rings of Phe140 and Phe232 brings the N-terminal β-sheet to the vicinity of the C-terminus. The overall structure of *kpRstA* DBD shares a winged helix-turn-helix (wHTH) fold typical for the OmpR/PhoB RR superfamily, such as OmpR (PDB ID: 1OPC), PhoB (PDB ID: 1GXQ/1GXP) and KdpE (PDB ID: 3ZQ7), with Cα rmsd ranging from 1.1 to 1.4 Å.

The crystal structure of *kpRstA* DBD/DNA-23 consists of two protein molecules and one 23-bp DNA per asymmetric unit (Figure 2C). In the crystal packing, the DNA duplexes formed a pseudo-continuous DNA helix stabilized by base-stacking interactions between symmetry-related DNA. Superimposition of the two *kpRstA* DBDs in the asymmetric unit showed that their structures are very similar, with an rmsd of 0.67 Å over 93 Cα atoms (see Supplemental Figure S2). The two DBDs bind on the same side of the DNA in a head-to-tail fashion and the electrostatic potential surface of the protein dimer forms a long and continuous positively charged region for DNA binding. The α3 recognition helix is docked into the major groove of the DNA and forms numerous interactions with the RstA box. The C-terminal β-hairpin also makes contact with the DNA, mostly close to the phosphate backbone. Unlike the bent DNA conformation observed for the PhoB DBD/DNA complex (21), the DNA-23 in *kpRstA* DBD/DNA-23 complex only displayed slight bending (~10°).

### Dimerization of *kpRstA* RD

All structures of the OmpR/PhoB superfamily RRs solved to date adopt a similar dimeric structure in the phosphorylated (active) state, which can be mimicked by the BeF<sub>3</sub><sup>−</sup>

bound form (6). In *kpRstA* RD, the BeF<sub>3</sub><sup>−</sup> molecule is non-covalently bound to Asp52 within the phosphorylation site, and forms a hydrogen bond with the side-chain of Thr79, a salt bridge to Lys101, and van der Waals contacts with the backbone nitrogen atoms of Ile53, Met54 and Ser80 (Figure 3A). One of the fluorine atoms is coordinated to an Mg<sup>2+</sup> atom, which in turn coordinates with the main chain carboxyl oxygen of Met54 and the side-chain carboxyl oxygen atoms of Glu8, Asp9 and Asp52 to form a 6-fold coordination of octahedral geometry. The interactions found in the phosphorylation site of *kpRstA* RD are analogous to those of other structures of active RRs from different subfamilies, underscoring the conserved nature of the phosphorylation site environment (6).

Previous studies on receiver domains of RRs have demonstrated that a molecular switch comprised of a highly conserved residue pair (Thr/Ser and Tyr/Phe) was able to exchange between inward (active) and outward (inactive) conformations in response to phosphorylation (51–54). Superimposing the structure of activated *kpRstA* RD onto the inactive PhoP RD (PDB ID: 2PKX) suggests that the signature switch residues are likely Thr79 and Tyr98, which are located in the β4–α4 loop and β5, respectively (Figure 3B) (53). This molecular switch could propagate the structural changes at the phosphorylation site to the dimer interface, which spans the α4–β5–α5 region. Residues in this region are highly conserved in the OmpR/PhoB superfamily of RRs. The dimer interface of *kpRstA* RD has a buried surface area of 689.5 Å<sup>2</sup> as calculated with PISA (55). Two conserved intermolecular salt bridges are formed between Asp97 (β5)–Arg111 (α5) at the center and Glu92 (α4)–Arg113 (α5) at the outer sides of the interface (Figure 3C). Additionally, six hydrophobic residues (Ile88, Leu91, Ala106, Val107, Ala110 and Leu114) cluster together to form an extensive hydrophobic patch that holds together

the  $\alpha 4$  and  $\alpha 5$  helices between adjacent molecules (Figure 3D).

### Interaction between *kpRstA* DBD and DNA

The two DNA-bound DBDs interact with each other with a buried surface area of  $362 \text{ \AA}^2$  per monomer at the protein-protein interface. The interface mostly consists of  $\beta 4$  and  $\beta 5$  of the upstream DBD (bound to the 5' half-site of the coding strand) on one end and the two loops between  $\beta 2$ – $\beta 3$  and  $\beta 3$ – $\alpha 1$  of the downstream DBD (bound to the 3' half-site of the coding strand) on the other end (Figure 4A). Intermolecular van der Waals contacts are formed between Gly177 ( $\alpha 1$ – $\alpha 2$  loop)–Val148 ( $\beta 2$ – $\beta 3$  loop), Glu218 ( $\alpha 3$ – $\beta 4$  loop)–Ala160 ( $\beta 3$ – $\alpha 1$  loop), Val225 ( $\beta 4$ )–Arg150 ( $\beta 3$ ), Val225 ( $\beta 4$ )–Thr163 ( $\alpha 1$ ), Leu231 ( $\beta 4$ )–Arg150 ( $\beta 3$ ), Pro234 (C-terminal tail)–Val148 ( $\beta 2$ – $\beta 3$  loop). Moreover, Lys223 ( $\beta 4$ ) and His235 (C-terminal tail) form hydrogen bonds with Asn149 ( $\beta 2$ – $\beta 3$  loop) and Arg226 ( $\beta 4$ – $\beta 5$  loop) forms a hydrogen bond with Thr163 ( $\alpha 1$ ). Lys223 ( $\beta 4$ ) is also within hydrogen bonding distance to Arg150 ( $\beta 3$ ). The extensive interactions observed between the upstream and downstream DBDs suggest that the two binding events are not independent of each other, and formed the basis for the choice of a sequential binding model when fitting the ITC data. Similar DBD–DBD interfaces have been observed for DNA-bound PhoB and KdpE (21,56), even though the residues involved share little homology amongst the different proteins (see Supplemental Figure S1).

The two *kpRstA* DBDs within an asymmetric unit bind to the DNA with similar contacts (Figure 4B and C), with contact surfaces of  $882 \text{ \AA}^2$  between DNA and protein and  $899 \text{ \AA}^2$  for the upstream and downstream protomers, respectively. The upstream DBD binds the RstA box from T4 (coding strand) to A15' (the prime sign indicates the template strand), and the downstream DBD binds from C13 to G5' (Figure 4B). Specific interactions between the  $\alpha 3$  recognition helix residues and DNA, which include Val203-T6, Arg207-G5, Arg199-G17' and Arg199-T16', provide the basis for sequence specificity. It should be noted that while the upstream Arg199 forms two specific hydrogen bonds with the template strand of the RstA box TACA, G17' and T16', the downstream Arg199 contacts the DNA duplex by forming three hydrogen bonds: Arg199-A17, Arg199-G17' and Arg199-A6' (Figure 4C). This observation implies that the side chain of Arg199 is capable of recognizing nucleotide sequences that deviate from the canonical RstA box. Similarly, there are numerous interactions between the second *kpRstA* DBD and the second RstA box. Base specificity is established mainly through the residues Arg200, Ser201, Val204 and Arg208 (Figure 4C).

The binding interface of the *kpRstA* DBD/DNA complex in solution was also examined through NMR CSP studies (Figure 5A and B). Residues perturbed by the binding of DNA-16a localize primarily at the C-terminal region including helices  $\alpha 2$ ,  $\alpha 3$ ,  $\beta 4$ ,  $\beta 5$  and the  $\alpha 2$ – $\alpha 3$  loop, with the largest perturbations occurring at or near the  $\alpha 3$  recognition helix. Slight perturbation of the N-terminal region of  $\alpha 1$  was also observed. Noticeably, the N-terminal  $\beta$ -sheet showed very little perturbation. The observed CSPs are in

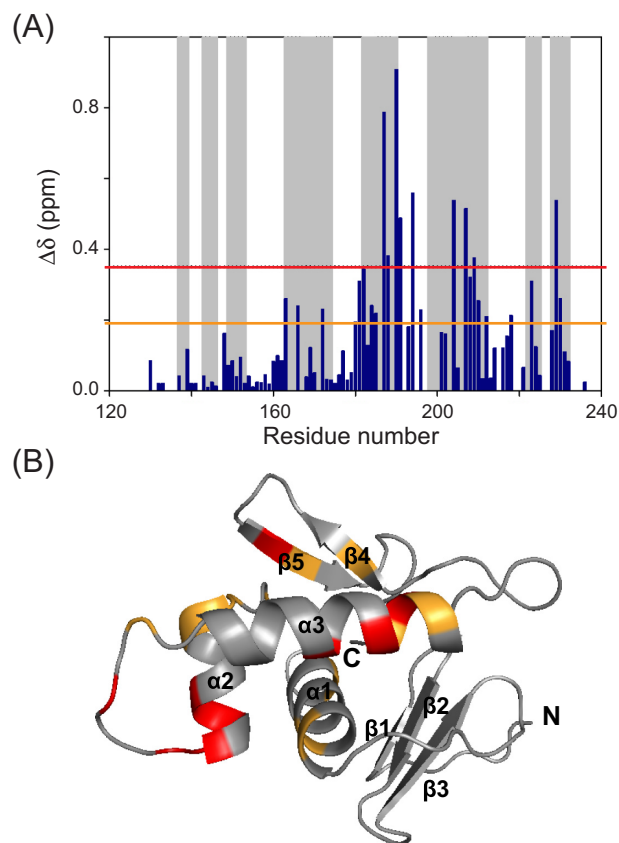

**Figure 5.** Interaction between *kpRstA* DBD and DNA-16a. The normalized chemical shift perturbations (CSP) of *kpRstA* DBD induced by binding to DNA are shown in (A). Residues with CSP above the upper (red) and lower (orange) lines are mapped to the DBD structure in (B).

full agreement with the DBD/DNA interactions identified in the crystal structure of the complex.

### Structural and backbone dynamics changes of *kpRstA* DBD upon DNA binding

Superposition of the DNA-free NMR structure and DNA-bound crystal structure of the DBD revealed that their overall structures are similar with an rmsd of  $1.43 \text{ \AA}$  for 101  $C\alpha$  atoms (Figure 6A). However, superimposing the N-terminal halves (res. 135–190) of the two structures resulted in an rmsd of  $1.12 \text{ \AA}$  for 52  $C\alpha$  atoms (Figure 6B), whereas superposition of the C-terminal halves (res. 191–235) resulted in an rmsd of  $1.70 \text{ \AA}$  for 36  $C\alpha$  atoms (Figure 6C), indicating that the region spanning the transactivation loop to  $\beta 4$  and  $\beta 5$  undergoes large conformational changes upon DNA-binding. Noticeably, the  $\alpha 3$ – $\beta 4$  loop swings  $\sim 90^\circ$  towards the template strand of the DNA in the complex, which results in Ala216 interacting with the ribose part of G17'. Moreover, insertion of Arg226 into the minor groove brings the  $\beta 4$ – $\beta 5$  loop into contact with the DNA and clamps down the template strand alongside the  $\alpha 3$  recognition helix, further stabilizing the interaction between the DBD and DNA.

To gain further insights into the dynamic behavior of *kpRstA* DBD, we investigated the backbone dynamics

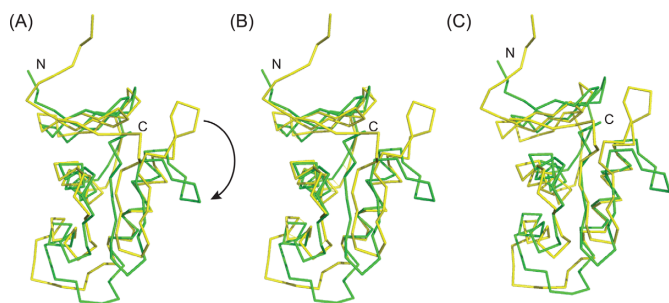

**Figure 6.** Conformational changes of *kpRstA* DBD upon binding to the RstA box DNA. (A) Superposition of the DNA-free (yellow) and DNA-bound (green) structures of the DBD. The apex of the  $\alpha 3$ – $\beta 4$  loop swings down towards the  $\alpha 3$  helix (shown in arrow). (B) Superposition of the same structures as (A) by superimposing the N-terminal region (res. 135–190). (C) Superposition of the same structures as (A) by superimposing the C-terminal region (res. 191–235).

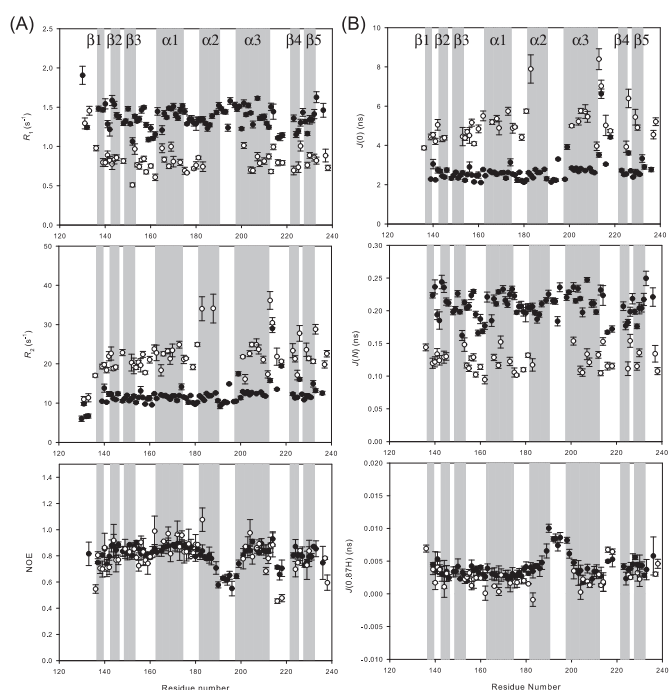

**Figure 7.** Dynamics of *kpRstA* DBD as probed by NMR. (A) Sequence variations of the  $^1\text{H}$ -,  $^{15}\text{N}$ - $R_1$  (top),  $^{15}\text{N}$ - $R_2$  (middle) and  $^{15}\text{N}$  NOE (bottom) of *kpRstA* DBD (filled circles) and *kpRstA* DBD/DNA-16a complex (open circles). (B) Sequence variations of the reduced spectral density functions  $J(0)$  (top),  $J(N)$  (middle) and  $J(0.87\text{H})$  (bottom) deduced from the dynamic data shown in (A).

of DNA-free *kpRstA* DBD and *kpRstA* DBD/DNA-16a complex by measuring  $^{15}\text{N}$ - $R_1$ ,  $^{15}\text{N}$ - $R_2$  and  $[^1\text{H}$ - $^{15}\text{N}]$ -NOE at 800 MHz (Figure 7A) and calculating the reduced spectral density functions from these relaxation parameters (33,34,57,58). Reduced spectral density functions reflect the degree of motion in particular frequency regions. Thus, higher value of  $J(\omega)$  indicates the presence of motion at the frequency  $\omega$  MHz region. The results are shown in Figure 7B.  $J(0)$ ,  $J(N)$  and  $J(0.87\text{H})$  represent reduced spectral density function at 0, 80 and 696 MHz, respectively. Overall, the DNA-free *kpRstA* DBD (filled circles) is rigid, except two loop regions. The loop connecting  $\alpha 2$  and  $\alpha 3$

(Lys187–Ser200) is characterized by large  $J(0.87\text{H})$  indicative of the presence of high frequency fast motion. Another loop region showing flexibility is that connecting  $\alpha 3$  and  $\beta 4$  (Ala216–Glu218). This region also showed elevated  $J(0.87\text{H})$  suggesting the presence of fast motion. Moreover, this loop region also showed considerable slow motion, as indicated by large  $J(0)$ . Interestingly, these two loop regions juxtapose helix  $\alpha 3$ . In the DNA-bound form (open circles), the DBD showed a similar dynamic behavior and the two flexible loops between Ala216–Glu218 and Lys187–Ser200 also exhibit higher flexibility as observed in the free form. However, reliable relaxation measurements cannot be obtained for many resonances between  $\alpha 2$  and  $\alpha 3$ , indicating that this region becomes more flexible upon DNA-binding. One also observes higher and more scattered  $J(0)$  for the  $\alpha 3$ – $\beta 4$  region, suggesting that the entire C-terminal region beyond  $\alpha 2$  exhibit slow motion, possibly some conformational exchange process. The functional significance of the enhanced dynamics of the two regions is discussed in the following section. In agreement with the monomeric protein sizes, the overall rotational correlation times deduced from the relaxation data are 6.75 and 12.5 ns for the DNA-free and DNA-bound form, respectively.

## DISCUSSION

### *kpRstA* DBD binds DNA in sequential mode

Modulation of gene expression by RRs in bacteria has been well studied, and much of the structural changes resulting from the activation of the RD are relatively well understood (51,52,54,59). On the other hand, the DNA-bound structure of PhoB DBD has for a long time been the only source of information for structural changes of the DBD upon binding to DNA (21). Recently, the structures of *K. pneumoniae* PmrA DBD and *E. coli* KdpE bound to their respective cognate DNA sequences have been solved (22,56). Although PhoB, PmrA and KdpE belong to the same OmpR/PhoB subfamily, their DBDs have shown very different structural and functional characteristics when bound to DNA. For example, binding of PhoB to its cognate sequence introduces a  $\sim 40^\circ$  bend in the DNA, whereas binding of KdpE or PmrA to DNA only introduces slight bending. However, binding of KdpE to DNA results in a much larger dimer surface than in PmrA. This lack of a consensus binding mechanism is also observed for *kpRstA*, which belongs to the same subfamily. *kpRstA* DBD binds to the RstA box without inducing substantial bending of the DNA and forms a dimer interface comparable to that of KdpE. Yet unlike KdpE, binding of *kpRstA* DBD to the two half-sites of the RstA box have very different affinities, whereas KdpE DBD reportedly binds to its two cognate half-sites with similar affinity (60). Moreover, binding of full-length *kpRstA* to the full-length RstA box is clearly biphasic in sequential mode (Figure 1D and E), which has never been reported for other RRs from the OmpR/PhoB subfamily. These observations suggest that the DNA-binding properties of RRs in the same family need to be examined on an individual basis, even though they might share a similar structural fold.

The affinities of *kpRstA* DBD and full-length *kpRstA* toward cognate DNA measured in this study are gener-



ally weaker than those reported for other RRs. PmrA and KdpE DBDs all bind to their respective high-affinity half-sites at sub-micromolar concentrations (22,60), which are one to two orders of magnitude stronger than the affinity of *kpRstA* DBD towards DNA-16a (Figure 2A). Full-length *kpRstA* also binds to the full-length RstA box (Figure 2E and F) at lower affinity than binding of PhoB towards a consensus *pho* box (61). Although all response regulators with data available show no difference in either structure or function between the  $\text{BeF}_3^-$ -bound and phosphorylated forms (62), we cannot exclude the possibility that  $\text{BeF}_3^-$  is not able to activate *kpRstA* to the same extent as phosphorylation. Interestingly, the promoter region of the *asr* operon harbors binding sites to both RstA and PhoB, although either protein is capable of activating the operon by itself (7). We speculate that the arrangement of a strong- and weak-binding element would enhance the dynamic range of gene expression and allow for fine-tuning of gene regulation. The *csgD* promoter region also contains RstA and OmpR binding sites, but in this case the two sites overlap extensively (7). Since the RstB/RstA and EnvZ/OmpR TCS respond to different types of environmental stress, the large difference in DNA-binding affinity between RstA and OmpR should have little relevance on the regulation of CsgD by RstA.

The lack of affinity for the downstream half-site displayed by the DBD and the biphasic binding behavior of full-length *kpRstA* indicate that the two DBDs in the *kpRstA* dimer bind to the full-length RstA box in a sequential fashion (Figure 2). Our structural studies suggest that binding of the first DBD to the upstream half-site bring the  $\alpha 3$ - $\beta 4$  loop close to the DNA, which would then place Glu218 in a position to form inter-DBD contacts with Ala160 (Figure 4B). Backbone dynamics further suggest that Arg226 becomes more rigid when interacting with DNA, as observed from the increase in  $J(0)$  and concomitant decrease in  $J(N)$  and  $J(0.87H)$  in Figure 7, which would help stabilize the Arg226-Thr163 inter-DBD hydrogen bond. Thus, binding of one *kpRstA* DBD promotes the binding of the second DBD to the second site on RstA box in a cooperative manner. Whether this sequential binding behavior is dependent on the sequence of the DNA, particularly of the downstream half-site is currently unknown. It is worth noting that, unlike in *E. coli*, neither *asr* nor *csgD* of *K. pneumoniae* contain the classic RstA box (TACANNNTACA) sequences in their promoter region. In fact, *K. pneumoniae* homologs of the putative *E. coli* genes that may be targets of RstA as proposed by Osagawara et al. (8) did not harbor the classic RstA box either. The unexpected absence of classic RstA boxes in homologous genes hints at divergent RstA-DNA recognition between *K. pneumoniae* and *E. coli*.

### RD dimerization is entropy driven

Binding of the second DBD to the second half-site features a strong entropic component (see Table 1) contingent on the presence of the RD. In protein-DNA complexes, favorable binding entropy primarily originates from desolvation of nonpolar surfaces (63). Incidentally, the RD of *kpRstA* contains an extensive hydrophobic patch at the  $\alpha 4$ - $\beta 5$ - $\alpha 5$  region, which forms the dimer interface in the active form (Figure 3D). Inactive *kpRstA* RD spontaneously

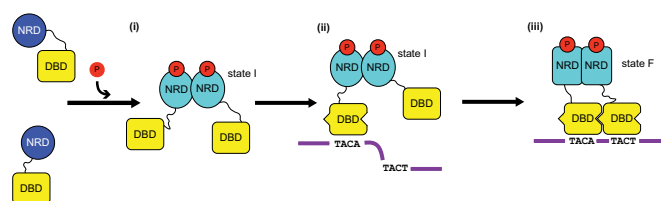

**Figure 8.** Proposed structure-based model for binding of *kpRstA* to the RstA box DNA. (i) phosphorylation of the RD results in formation of *kpRstA* dimers with an intermediate RD-RD interface conformation (state I). Due to the presence of two DBDs close in space, the DNA-binding affinity is increased compared to the unphosphorylated form. (ii) Binding of the first DBD to the upstream half-site of the RstA box causes conformational changes in the first DBD, ‘priming’ it for interaction with the second DBD. (iii) The second DBD binds to the downstream half-site and ‘locks’ the complex through DBD-DBD and RD-RD interactions. At the same time, the RD-RD dimer assumes its final conformation (state F), providing the entropic energy required for the second binding event.

forms dimers at high concentrations as observed from the line-widths in NMR spectra (data not shown), suggesting that the dimer interface is exposed to the solvent. The  $\alpha 4$ - $\beta 5$ - $\alpha 5$  region also contains a number of charged residues, which may harbor non-specific binding sites for anions and cations. Based on these premises, we would argue that the entropic contribution arises from the release of water and ions at the  $\alpha 4$ - $\beta 5$ - $\alpha 5$  region upon RD dimerization, which is induced by the binding of the second DBD to the downstream half-site. However, in the presence of  $\text{BeF}_3^-$ , one would expect the dimerization to occur before titrating the protein into the DNA solution, hence the entropic energy should noticeably decrease. This is not observed in our ITC experiments. One possibility is that the RD dimer interface within the full-length *kpRstA* can access different conformations depending on whether the DBD is bound to DNA and the RD binds  $\text{BeF}_3^-$ , and only when both types of interactions are present will the interface adopt its final form, similar to the multiple states observed for the CheY response regulator under different experimental conditions (64,65). Effort is currently under way to test this possibility.

### The ‘prime-and-lock’ model for the activation of *kpRstA*

Taken together, we propose that binding between *kpRstA* and its cognate DNA sequences utilizes a ‘prime-and-lock’ mechanism, shown in Figure 8. The process is divided into the following steps: (i) phosphorylation of the RD results in formation of RstA dimers with an intermediate RD-RD interface conformation and concomitant release of the inhibitory effect by the RD (state I). (ii) Binding of the first DBD on the upstream half-site of the RstA box causes conformational changes in the first DBD, ‘priming’ it for interaction with the second DBD. The transactivation loop (Gly191-Arg199) also becomes more flexible (see Figure 7). (iii) The second DBD binds to the downstream half-site and ‘locks’ the complex through DBD-DBD and RD-RD interactions. At the same time, the RD-RD dimer assumes its final conformation (state F), providing the entropic energy required for the second binding event. The flexible transactivation loop is now in position to recruit the  $\sigma$  subunit of RNA polymerase for downstream gene activation (66).

The enhanced dynamics allows the transactivation loop to sample the space around the promoter in a short time, increasing the chance of encountering the  $\sigma$  subunit. Thus, our model presents the following highlights: (a) Phosphorylation of the RD is a pre-requisite for *kpRstA* to bind to DNA, since otherwise the binding affinity would be too weak. As such, tight control of RstA-activated genes can be achieved simply by controlling the population of phosphorylated *kpRstA*. (b) Binding of both DBDs within a *kpRstA* dimer to the DNA is necessary for the formation of a stable activation complex. The first binding event anchors the dimer to potential binding sites, allowing the second binding event to occur provided that a downstream half-site is available. In the absence of the downstream half-site (i.e. wrong binding site), the binding affinity of the first DBD towards the upstream half-site alone would not be enough to maintain the activation complex. (c) Binding to DNA instigates functionally relevant changes in backbone dynamics of the DBD. The current paradigm for regulation in RRs emphasizes the importance of interfaces created between domains rather than conformational changes (56,67). Also, the importance of interfaces in promoting the strong binding of RstA to DNA is clearly the most important factor in cooperative binding of the second DBD to DNA. We observed extensive interactions between the upstream and downstream DBDs indicating that the two binding events are not independent of each other, and formed the basis for the choice of a sequential binding for our model. However, significant structural changes were also observed between the DNA-free and the DNA-bound RstA DBDs, Noticeably, the  $\alpha 3$ - $\beta 4$  transactivation loop swings  $\sim 90^\circ$  toward the template strand of the DNA in forming the complex. In conclusion, our model provides a framework for RstA-DNA interaction that can be experimentally validated in future studies.

#### ACCESSION NUMBERS

PDB IDs: 2MLK, 1ZES, 4NHJ, 4NIC, 1OPC, 1GXQ, 1GXP, 3ZQ7 and 2PKX.

#### SUPPLEMENTARY DATA

[Supplementary Data](#) are available at NAR Online.

#### ACKNOWLEDGEMENTS

We thank Dr Shu-Chuan Jao of the Biophysics Core Facility, Scientific Instrument Center at Academia Sinica for providing technical assistance on ITC experiments. NMR experiments were carried out at the High-Field Nuclear Magnetic Resonance Center, supported by Core Facility for Protein Structural Analysis, National Core Facility Program for Biotechnology, the Ministry of Science and Technology of the Republic of China. We are grateful for access to the synchrotron radiation beamline 13C1 at the National Synchrotron Radiation Research Center, Hsinchu, Republic of China.

#### FUNDING

Ministry of Science and Technology of the Republic of China [NSC 100-2311-B-001-023 to T.H.H. and NSC101-

2311-B-001-023-MY3 to C.-D.H.]. Funding for open access charge: Academia Sinica and Ministry of Science and Technology of the Republic of China [NSC 100-2311-B-001-023 to T.H.H. and NSC101-2311-B-001-023-MY3 to C.-D.H.]. *Conflict of interest statement.* None declared.

#### REFERENCES

- Chang, C. and Stewart, R.C. (1998) The two-component system. Regulation of diverse signaling pathways in prokaryotes and eukaryotes. *Plant Physiol.*, **117**, 723–731.
- Groisman, E.A. (2001) The pleiotropic two-component regulatory system PhoP-PhoQ. *J. Bacteriol.*, **183**, 1835–1842.
- Nixon, B.T., Ronson, C.W. and Ausubel, F.M. (1986) Two-component regulatory systems responsive to environmental stimuli share strongly conserved domains with the nitrogen assimilation regulatory genes *ntrB* and *ntrC*. *Proc. Natl. Acad. Sci. U.S.A.*, **83**, 7850–7854.
- Parkinson, J.S. and Kofoid, E.C. (1992) Communication modules in bacterial signaling proteins. *Annu. Rev. Genet.*, **26**, 71–112.
- Wuichet, K., Cantwell, B.J. and Zhulin, I.B. (2010) Evolution and phyletic distribution of two-component signal transduction systems. *Curr. Opin. Microbiol.*, **13**, 219–225.
- Gao, R., Mack, T.R. and Stock, A.M. (2007) Bacterial response regulators: versatile regulatory strategies from common domains. *Trends Biochem. Sci.*, **32**, 225–234.
- Ogasawara, H., Yamada, K., Kori, A., Yamamoto, K. and Ishihama, A. (2010) Regulation of the *Escherichia coli* *csgD* promoter: interplay between five transcription factors. *Microbiology*, **156**, 2470–2483.
- Ogasawara, H., Hasegawa, A., Kanda, E., Miki, T., Yamamoto, K. and Ishihama, A. (2007) Genomic SELEX search for target Promoters under the Control of the PhoQP-RstBA Signal Relay Cascade. *J. Bacteriol.*, **189**, 4791–4799.
- Cabeza, M.L., Aguirre, A., Soncini, F.C. and Vescovi, E.G. (2007) Induction of RpoS degradation by the two-component system regulator RstA in *Salmonella enterica*. *J. Bacteriol.*, **189**, 7335–7342.
- Jeon, J., Kim, H., Yun, J., Ryu, S., Groisman, E.A. and Shin, D. (2008) RstA-promoted expression of the ferrous iron transporter *FeoB* under iron-replete conditions enhances *fur* activity in *Salmonella enterica*. *J. Bacteriol.*, **190**, 7326–7334.
- del Castillo-Rueda, A. and Khosravi-Shahi, P. (2010) The role of iron in the interaction between host and pathogen. *Med. Clin. (Barc.)*, **134**, 452–456.
- Donlan, R.M. and Costerton, J.W. (2002) Biofilms: survival mechanisms of clinically relevant microorganisms. *Clin. Microbiol. Rev.*, **15**, 167–193.
- Perry, R.D. and Fetherston, J.D. (2007) *The Genus Yersinia: From Genomics to Function*. Springer, New York.
- Asensio, A., Oliver, A., Gonzalez-Diego, P., Baquero, F., Perez-Diaz, J.C., Ros, P., Cobo, J., Palacios, M., Lasheras, D. and Canton, R. (2000) Outbreak of a multiresistant *Klebsiella pneumoniae* strain in an intensive care unit: antibiotic use as risk factor for colonization and infection. *Clin. Infect. Dis.*, **30**, 55–60.
- Harlocker, S.L., Bergstrom, L. and Inouye, M. (1995) Tandem binding of six *OmpR* proteins to the *ompF* upstream regulatory sequence of *Escherichia coli*. *J. Biol. Chem.*, **270**, 26849–26856.
- Okamura, H., Hanaoka, S., Nagadoi, A., Makino, K. and Nishimura, Y. (2000) Structural comparison of the PhoB and *OmpR* DNA-binding/transactivation domains and the arrangement of PhoB molecules on the phosphate box. *J. Mol. Biol.*, **295**, 1225–1236.
- Cai, Y.-W. (2009) *Characterization of the two-component system RstA/RstB in Klebsiella pneumoniae CG43*. Master thesis. National Chiao Tung University, Hsinchu, Taiwan.
- Martinez-Hackert, E. and Stock, A.M. (1997) The DNA-binding domain of *OmpR*: crystal structures of a winged helix transcription factor. *Structure*, **5**, 109–124.
- Mizuno, T. and Tanaka, I. (1997) Structure of the DNA-binding domain of the *OmpR* family of response regulators. *Mol. Microbiol.*, **24**, 665–667.
- Rhee, J.E., Sheng, W., Morgan, L.K., Nolet, R., Liao, X. and Kenney, L.J. (2008) Amino acids important for DNA recognition by the response regulator *OmpR*. *J. Biol. Chem.*, **283**, 8664–8677.

21. Blanco, A.G., Sola, M., Gomis-Rüth, F.X. and Coll, M. (2002) Tandem DNA recognition by PhoB, a two-component signal transduction transcriptional activator. *Structure*, **10**, 701–713.
22. Lou, Y.-C., Wang, I., Rajasekaran, M., Kao, Y.-F., Ho, M.-R., Hsu, S.-T.D., Chou, S.-H., Wu, S.-H. and Chen, C. (2014) Solution structure and tandem DNA recognition of the C-terminal effector domain of PmrA from *Klebsiella pneumoniae*. *Nucleic Acids Res.*, **42**, 4080–4093.
23. Gardner, K.H. and Kay, L.E. (1998) The use of  $^2\text{H}$ ,  $^{13}\text{C}$ ,  $^{15}\text{N}$  multidimensional NMR to study the structure and dynamics of proteins. *Annu. Rev. Biophys. Biomol. Struct.*, **27**, 357–406.
24. Kanelis, V., Forman-Kay, J.D. and Kay, L.E. (2001) Multidimensional NMR methods for protein structure determination. *IUBMB Life*, **52**, 291–302.
25. Bax, A. (1994) Multidimensional nuclear magnetic resonance methods for protein studies. *Curr. Opin. Struct. Biol.*, **4**, 738–744.
26. Cavanagh, J., Fairbrother, W.J., Palmer, A.G. and Skelton, N.J. (1996) *Protein NMR Spectroscopy—Principles and Practice*. Academic Press, San Diego.
27. Sattler, M., Schleucher, J. and Griesinger, C. (1999) Heteronuclear multidimensional NMR experiments for the structure determination of proteins in solution employing pulsed field gradients. *Prog. Nucl. Magn. Reson. Spectrosc.*, **34**, 93–158.
28. Chen, S.C., Chang, C.F., Fan, P.J., Cheng, Y.H., Yu, T. and Huang, T.-h. (2013)  $^1\text{H}$ ,  $^{13}\text{C}$  and  $^{15}\text{N}$  resonance assignments of the C-terminal DNA-binding domain of RstA protein from *Klebsiella pneumoniae*. *Biomol. NMR Assign.*, **7**, 85–88.
29. Markley, J.L., Bax, A., Arata, Y., Hilbers, C.W., Kaptein, R., Sykes, B., Wright, P.E. and Wuthrich, K. (1998) Recommendation of the presentation of NMR structures of proteins and nucleic acids. IUPAC-IUBMB-IUPAB inter-union task group on standardization of data bases of protein and nucleic acid structure determined by NMR spectroscopy. *Eur. J. Biochem.*, **256**, 1–15.
30. Cordier, F., Dingley, A.J. and Grzesiek, S. (1999) A doublet-separated sensitivity-enhanced HSQC for the determination of scalar and dipolar one-bond J-couplings. *J. Biomol. NMR*, **13**, 175–180.
31. Zweckstetter, M. (2008) NMR: prediction of molecular alignment from structure using the PALES software. *Nat. Protoc.*, **3**, 679–690.
32. Kay, L.E., Nicholson, L., Delaglio, F., Bax, A. and Torchia, D. (1992) Pulse sequences for removal of the effects of cross correlation between dipolar and chemical-shift anisotropy relaxation mechanisms on the measurement of heteronuclear T1 and T2 values in proteins. *J. Magn. Reson.*, **97**, 39–375.
33. Farrow, N.A., Zhang, O., Szabo, A., Torchia, D.A. and Kay, L.E. (1995) Spectral density mapping using  $^{15}\text{N}$  relaxation data exclusively. *J. Biomol. NMR*, **6**, 153–162.
34. Lefevre, L.-F., Dayie, K.T., Peng, J.W. and Wagner, G. (1996) Internal mobility in the partially folded DNA binding and dimerization domains of GAL4: NMR analysis of the N-H spectral density functions. *Biochemistry*, **35**, 2674–2686.
35. Ishima, R. and Nagayama, K. (1995) Quasi-spectral density function analysis for nitrogen-15 nuclei in proteins. *J. Magn. Reson.*, **B 108**, 73–76.
36. Hiyama, Y., Niu, C.H., Silverston, J.V., Bavavo, A. and Torchia, D.A. (1988) Determination of  $^{15}\text{N}$  chemical shift tensor via  $^{15}\text{N}$ - $^2\text{H}$  dipolar coupling in Bocglycylglycyl[ $^{15}\text{N}$ ] glycine benzyl ester. *J. Am. Chem. Soc.*, **110**, 2378–2383.
37. Bracken, C., Carr, P.A., Cavanagh, J. and Palmer, A.G. (1999) Temperature dependence of intramolecular dynamics of the basic leucine zipper of GCN4: implications for the entropy of association with DNA. *J. Mol. Biol.*, **285**, 2133–2146.
38. Guntert, P., Mumenthaler, C. and Wuthrich, K. (1997) Torsion angle dynamics for NMR structure calculation with the new program DYANA. *J. Mol. Biol.*, **273**, 283–298.
39. Herrmann, T., Guntert, P. and Wuthrich, K. (2002) Protein NMR structure determination with automated NOE assignment using the new software CANDID and the torsion angle dynamics algorithm DYANA. *J. Mol. Biol.*, **319**, 209–227.
40. Shen, Y., Delaglio, F., Cornilescu, G. and Bax, A. (2009) TALOS+: a hybrid method for predicting protein backbone torsion angles from NMR chemical shifts. *J. Biomol. NMR*, **44**, 213–223.
41. Koradi, R., Billeter, M. and Wuthrich, K. (1996) MOLMOL: a program for display and analysis of macromolecular structures. *J. Mol. Graph.*, **14**, 29–32.
42. Schrodinger, L.L.C. (2010) *The PyMOL Molecular Graphics System*, Version 1.3r1.
43. McPherson, A. (1990) Current approaches to macromolecular crystallization. *Eur. J. Biochem.*, **189**, 1–23.
44. Otwinowski, Z. and Minor, W. (1997) Processing of X-ray diffraction data collected in oscillation mode. *Method Enzymol.*, **276**, 307–326.
45. Zwart, P.H., Afonine, P.V., Grosse-Kunstleve, R.W., Hung, L.W., Ioerger, T.R., McCoy, A.J., McKee, E., Moriarty, N.W., Read, R.J., Sacchettini, J.C. et al. (2008) Automated structure solution with the PHENIX suite. *Method Mol. Biol.*, **426**, 419–435.
46. Emsley, P. and Cowtan, K. (2004) Coot: model-building tools for molecular graphics. *Acta Crystallogr. D. Biol. Crystallogr.*, **60**, 2126–2132.
47. Adams, P.D., Afonine, P.V., Bunkóczi, G., Chen, V.B., Davis, I.W., Echols, N., Headd, J.J., Hung, L.-W., Kapral, G.J., Grosse-Kunstleve, R.W. et al. (2010) PHENIX: a comprehensive Python-based system for macromolecular structure solution. *Acta Crystallogr. D. Biol. Crystallogr.*, **66**, 213–221.
48. Nowak, E., Panjikar, S., Konarev, P., Svergun, D.I. and Tucker, P.A. (2006) The structural basis of signal transduction for the response regulator PrrA from *Mycobacterium tuberculosis*. *J. Biol. Chem.*, **281**, 9659–9666.
49. Bachhawat, P., Swapna, G.V., Montelione, G.T. and Stock, A.M. (2005) Mechanism of activation for transcription factor PhoB suggested by different modes of dimerization in the inactive and active states. *Structure*, **13**, 1353–1363.
50. Sola, M., Gomis-Ruth, F.X., Serrano, L., Gonzalez, A. and Coll, M. (1999) Three-dimensional crystal structure of the transcription factor PhoB receiver domain. *J. Mol. Biol.*, **285**, 675–687.
51. Toro-Roman, A., Wu, T. and Stock, A.M. (2005) A common dimerization interface in bacterial response regulators KdpE and TorR. *Protein Sci.*, **14**, 3077–3088.
52. Toro-Roman, A., Mack, T.R. and Stock, A.M. (2005) Structural analysis and solution studies of the activated regulatory domain of the response regulator ArcA: a symmetric dimer mediated by the alpha 4-beta 5-alpha 5 face. *J. Mol. Biol.*, **349**, 11–26.
53. Bachhawat, P. and Stock, A.M. (2007) Crystal structures of the receiver domain of the response regulator PhoP from *Escherichia coli* in the absence and presence of the phosphoryl analog beryll fluoride. *J. Bacteriol.*, **189**, 5987–5995.
54. Bachhawat, P., Swapna, G.V.T., Montelione, G.T. and Stock, A.M. (2005) Mechanism of activation for transcription factor PhoB suggested by different modes of dimerization in the inactive and active states. *Structure*, **13**, 1353–1363.
55. Krissinel, E. and Henrick, K. (2007) Inference of macromolecular assemblies from crystalline state. *J. Mol. Biol.*, **372**, 774–797.
56. Narayanan, A., Kumar, S., Evrard, A.N., Paul, L.N. and Yernool, D.A. (2014) An asymmetric heterodomain interface stabilizes a response regulator-DNA complex. *Nat. Commun.*, **5**, 3282. doi:10.1038/ncomms4282.
57. Chang, C.-F., Chou, H.-T., Chuang, J.L., Chuang, D.T. and Huang, T.-h. (2002) Solution structure and dynamics of the lipoic acid-bearing domain of human mitochondrial branched-chain alpha-keto acid dehydrogenase complex. *J. Biol. Chem.*, **277**, 15865–15873.
58. Jiang, I., Tsai, C.-K., Chen, S.-C., Wang, S.-h., Amiraslano, I., Chang, C.-F., Wu, W.-J., Tai, J.-H., Liaw, Y.-C. and Huang, T.-h. (2011) Molecular basis of the recognition of the ap65–1 gene transcription promoter elements by a Myb protein from the protozoan parasite *Trichomonas vaginalis*. *Nucleic Acids Res.*, **39**, 8992–9008.
59. Stock, A.M., Martinez-Hackert, E., Rasmussen, B.F., West, A.H., Stock, J.B., Ringe, D. and Petsko, G.A. (1993) Structure of the Mg(2+)-bound form of CheY and mechanism of phosphoryl transfer in bacterial chemotaxis. *Biochemistry*, **32**, 13375–13380.
60. Narayanan, A., Paul, L.N., Tomar, S., Patil, D.N., Kumar, P. and Yernool, D.A. (2012) Structure-function studies of DNA binding domain of response regulator KdpE reveals equal affinity interactions at DNA half-sites. *PLoS One*, **7**, e30102.
61. Ellison, D.W. and McCleary, W.R. (2000) The unphosphorylated receiver domain of PhoB silences the activity of its output domain. *J. Bacteriol.*, **182**, 6592–6597.
62. Wemmer, D.E. and Kern, D. (2005) Beryll fluoride binding mimics phosphorylation of aspartate in response regulators. *J. Bacteriol.*, **187**, 8229–8230.

63. Spolar,R.S. and Record,M.T. Jr. (1994) Coupling of local folding to site-specific binding of proteins to DNA. *Science*, **263**, 777–784.
64. Dyer,C.M. and Dahlquist,F.W. (2006) Switched or not?: the structure of unphosphorylated CheY bound to the N terminus of FliM. *J. Bacteriol.*, **188**, 7354–7363.
65. Guhaniyogi,J., Robinson,V.L. and Stock,A.M. (2006) Crystal structures of beryllium fluoride-free and beryllium fluoride-bound CheY in complex with the conserved C-terminal peptide of CheZ reveal dual binding modes specific to CheY conformation. *J. Mol. Biol.*, **359**, 624–645.
66. Blanco,A.G., Canals,A., Bernués,J., Solà,M. and Coll,M. (2011) The structure of a transcription activation subcomplex reveals how  $\sigma 70$  is recruited to PhoB promoters. *EMBO J.*, **30**, 3776–3785.
67. Gao,R. and Stock,A.M. (2010) Molecular strategies for phosphorylation-mediated regulation of response regulator activity. *Curr. Opin. Microbiol.*, **13**, 160–167.
